# Supplementary material for: m1A Regulator ALKBH1 and TRMT10B as Potential Prognostic Biomarkers and Related to Tumor Immune Microenvironment in Pancreatic Adenocarcinoma
Source: Research Square preprint supplement (doi:10.21203/rs.3.rs-1528350/v1), 2022-04-08
Supplement: Supplementary file 1 [file 9538d42ce8ae7240c4e38566.xlsx]

## Sheet: Table 1 GO analysis for genes (
Table 1 GO analysis for genes (the enrichment of biological process)
Item	ID	Description	P value	Rich factor
BP	GO:0006355	regulation of transcription, DNA-templated	2.28e-05	0.1584
BP	GO:0006357	regulation of transcription from RNA polymerase II promoter	4.79e-05	0.2079
BP	GO:0006397	mRNA processing	0.00230576	0.0594
BP	GO:0016567	protein ubiquitination	0.0110216	0.0792
BP	GO:0006338	chromatin remodeling	0.0223295	0.0396
BP	GO:0044648	histone H3-K4 dimethylation	0.0307056	0.0198
BP	GO:0000381	regulation of alternative mRNA splicing, via spliceosome	0.0320105	0.0297
BP	GO:0097692	histone H3-K4 monomethylation	0.0393062	0.0198
BP	GO:0006307	DNA dealkylation involved in DNA repair	0.0435782	0.0198
BP	GO:0032868	response to insulin	0.0460933	0.0297
BP	GO:0008380	RNA splicing	0.0534357	0.0396
BP	GO:0033169	histone H3-K9 demethylation	0.060479	0.0198
BP	GO:0006406	mRNA export from nucleus	0.079498	0.0297
BP	GO:0031507	heterochromatin assembly	0.0811905	0.0198
BP	GO:0045944	positive regulation of transcription from RNA polymerase II promoter	0.0842121	0.099
BP	GO:0030520	intracellular estrogen receptor signaling pathway	0.0852784	0.0198
BP	GO:0048024	regulation of mRNA splicing, via spliceosome	0.0893482	0.0198
BP	GO:0080182	histone H3-K4 trimethylation	0.0934002	0.0198
BP	GO:0000380	alternative mRNA splicing, via spliceosome	0.0974343	0.0198
BP	GO:0051568	histone H3-K4 methylation	0.0974343	0.0198
BP: Biological process
