# Supplementary material for: m1A Regulator ALKBH1 and TRMT10B as Potential Prognostic Biomarkers and Related to Tumor Immune Microenvironment in Pancreatic Adenocarcinoma
Source: Research Square preprint supplement (doi:10.21203/rs.3.rs-1528350/v1), 2022-04-08
Supplement: Supplementary file 2 [file dcea7e3ab29ee8d1ab2a6878.xlsx]

## Sheet: Table 2 GO analysis for genes (
Table 2 GO analysis for genes (the enrichment of cellular component)
Item	ID	Description	P value	Rich factor
CC	GO:0005634	nucleus	1.13e-08	0.5248
CC	GO:0005654	nucleoplasm	1.12e-06	0.3762
CC	GO:0016607	nuclear speck	0.000553	0.0891
CC	GO:000573	mitochondrion	0.0232903	0.1287
CC	GO:0016604	nuclear body	0.0608697	0.0495
CC	GO:0005759	mitochondrial matrix	0.0949884	0.0495
CC	GO:0031462	Cul2-RING ubiquitin ligase complex	0.0978228	0.0198
CC: Cellular component
